# Supplementary material for: Platinum nanoparticles supported on N-doped carbon nanotubes for the selective oxidation of glycerol to glyceric acid in a base-free aqueous solution
Source: Royal Society of Chemistry journal article supplement (doi:10.1039/c5ra02112j), 2015-01-01
Supplement: c5ra02112j1.pdf [file c5ra02112j1.pdf]

## **Electronic Supplementary Information**

### **Platinum nanoparticles supported on N-doped carbon nanotubes for the selective oxidation of glycerol to glyceric acid in a base-free aqueous solution**

Shasha Chen, Puyu Qi, Jin Chen, and Youzhu Yuan\*

State Key Laboratory of Physical Chemistry of Solid Surfaces and National  
Engineering Laboratory for Green Chemical Productions of Alcohols-Ethers-  
Esters, College of Chemistry and Chemical Engineering, Xiamen University,  
Xiamen 361005, China. E-mail: [zyyuan@xmu.edu.cn](mailto:zyyuan@xmu.edu.cn).

**Table S1** Physical properties of the catalyst supports with different N contents.

| Samples                               | $S_{\text{BET}}$<br>/m <sup>2</sup> g <sup>-1</sup> | $V_{\text{pore}}^{\text{a}}$<br>/cm <sup>3</sup> g <sup>-1</sup> | $D_{\text{pore}}$<br>/nm |
|---------------------------------------|-----------------------------------------------------|------------------------------------------------------------------|--------------------------|
| CNTs-353                              | 112.4                                               | 0.29                                                             | 10.2                     |
| N-CNTs(1.57)                          | 93.6                                                | 0.30                                                             | 12.0                     |
| N-CNTs(3.32)                          | 81.3                                                | 0.24                                                             | 11.3                     |
| N-CNTs(5.74)                          | 74.6                                                | 0.19                                                             | 11.1                     |
| N-CNTs(9.44)                          | 61.6                                                | 0.22                                                             | 14.0                     |
| N-CNTs(22.85)                         | 34.6                                                | 0.13                                                             | 14.2                     |
| C <sub>3</sub> N <sub>4</sub> (22.85) | 10.0                                                | 0.03                                                             | 7.7                      |

<sup>a</sup> Obtained from  $P/P_0 = 0.99$ .

**Table S2** Catalytic performance of catalysts with different supporting materials in base-free condition.<sup>a</sup>

| Catalyst                             | Conversion<br>/% | Selectivity /% |       |      |
|--------------------------------------|------------------|----------------|-------|------|
|                                      |                  | GLYA           | GLYDE | DHA  |
| 1% Pt/SBA-15-NH <sub>2</sub>         | 1.0              | –              | 100   | –    |
| 1% Pt/SiO <sub>2</sub>               | 30.7             | 22.1           | 53.6  | 17.8 |
| 1% Pt/Al <sub>2</sub> O <sub>3</sub> | 28.4             | 42.3           | 18.5  | 28.8 |
| 1% Pt/TiO <sub>2</sub>               | 49.4             | 42.5           | 28.8  | 20.7 |
| 1% Pt/C <sub>3</sub> N <sub>4</sub>  | 2.5              | 20.9           | 55.1  | 24.0 |
| 1% Pt/AC <sup>b</sup>                | 38.6             | 48.0           | 17.5  | 29.1 |
| 1% Pt/CMK <sup>c</sup>               | 55.4             | 49.4           | 14.4  | 29.6 |
| 1% Pt/graphite                       | 52.5             | 46.1           | 28.2  | 18.6 |
| 1% Pt/graphene                       | 55.8             | 44.3           | 29.8  | 19.8 |
| 1% Pt/CNTs-353                       | 51.5             | 43.2           | 26.4  | 23.2 |

<sup>a</sup> Reaction conditions: 10 mL glycerol aqueous solution (0.1 mol/L), 0.039 g catalyst, glycerol/Pt = 500 (molar ratio), T = 333 K, P (O<sub>2</sub>) atmospheric pressure, O<sub>2</sub> 10 mL/min, reaction time = 4 h. <sup>b</sup> Activated carbon. <sup>c</sup> Mesoporous carbon.

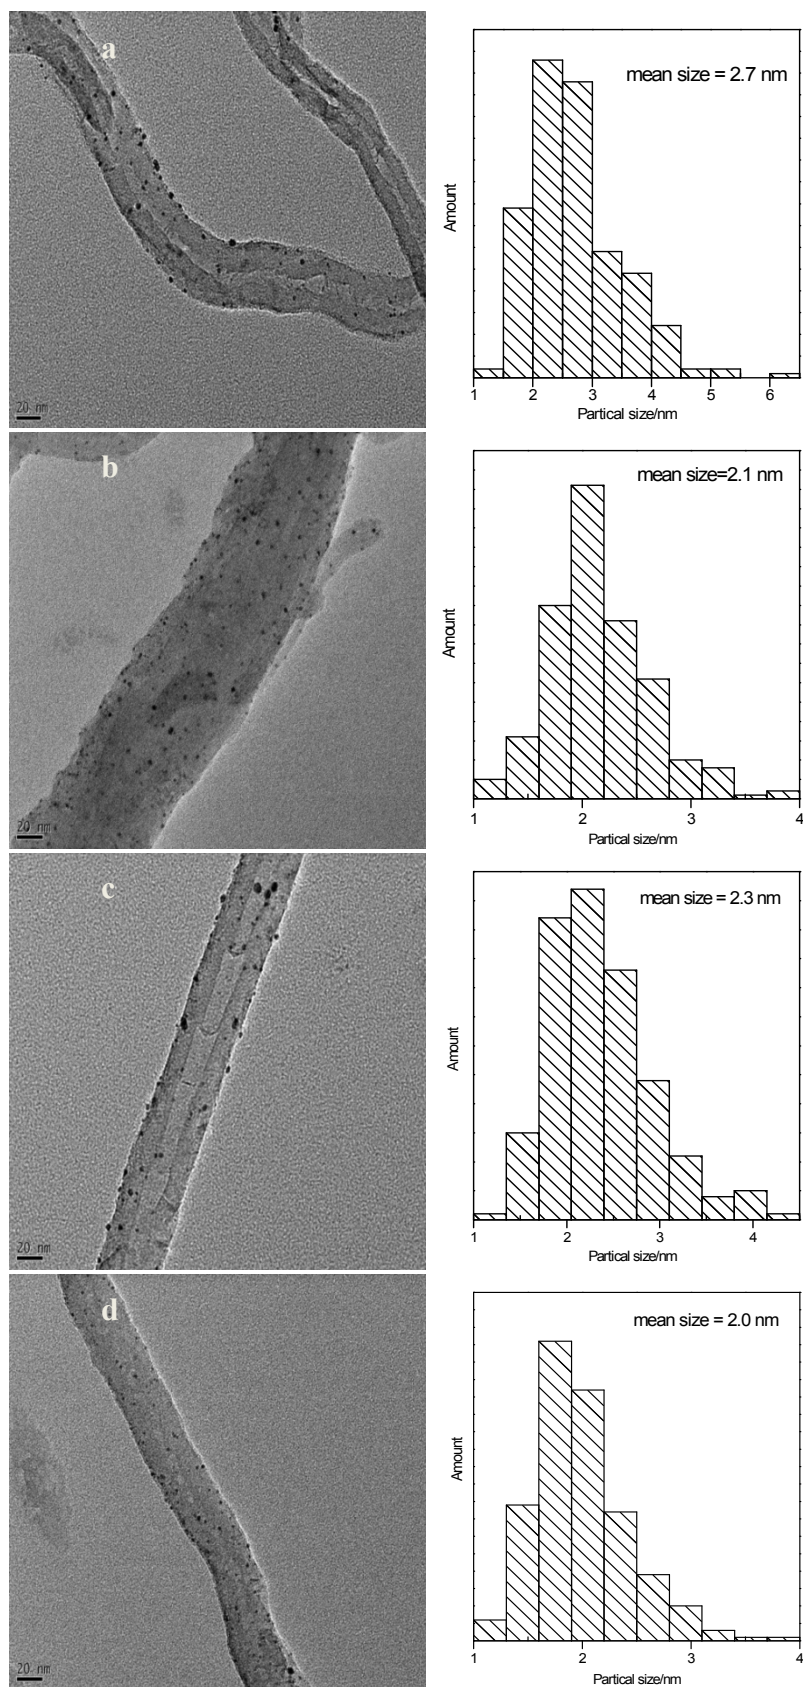

**Fig. S1** TEM images of catalysts with and without N doped: (a) 1%Pt/CNTs-353, (b) 1%Pt/N-CNTs(3.32), (c) 1%Pt/N-CNTs(5.74), (d) 1%Pt/N-CNTs(9.44).

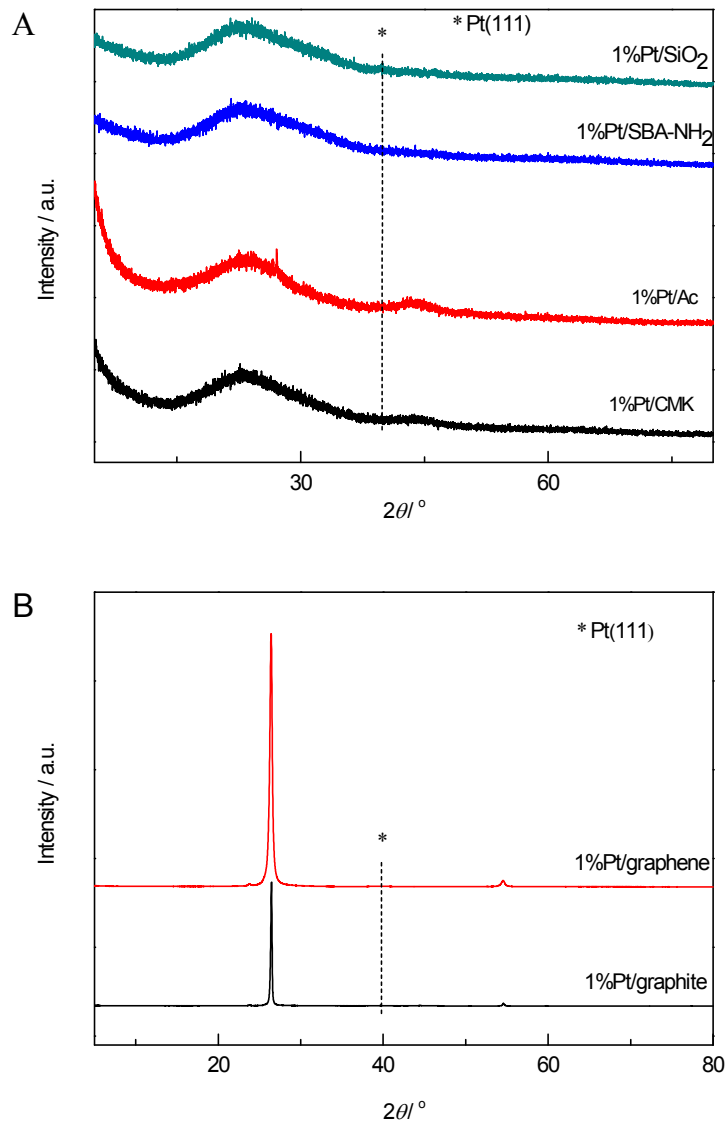

**Fig. S2** XRD patterns of the catalysts with different support materials.

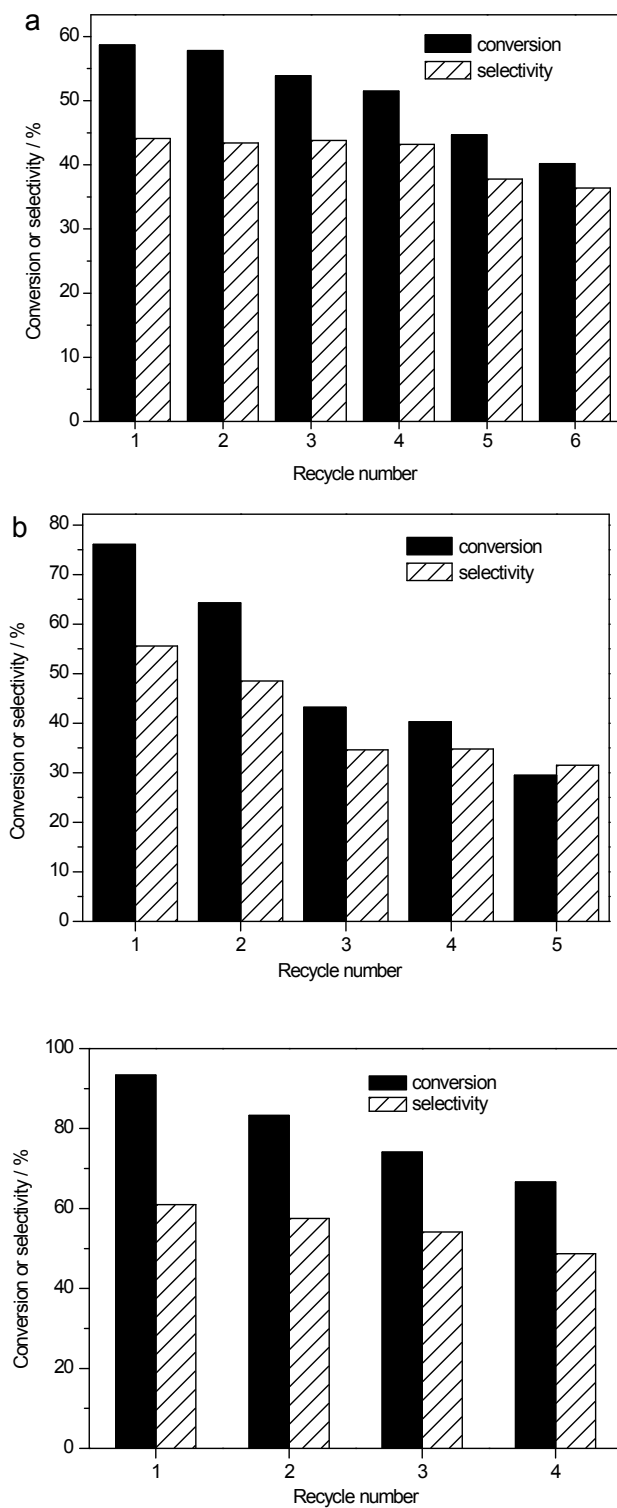

**Fig. S3** The conversion of glycerol and the selectivity of glyceric acid during the successive reaction: (a) 1%Pt/CNTs-353, reaction time 4 h, (b) 1%Pt/N-CNTs(5.74), reaction time 4 h, (c) 1%Pt/CNTs-353, reaction time 12 h, reactions are conducted in the same conditions.

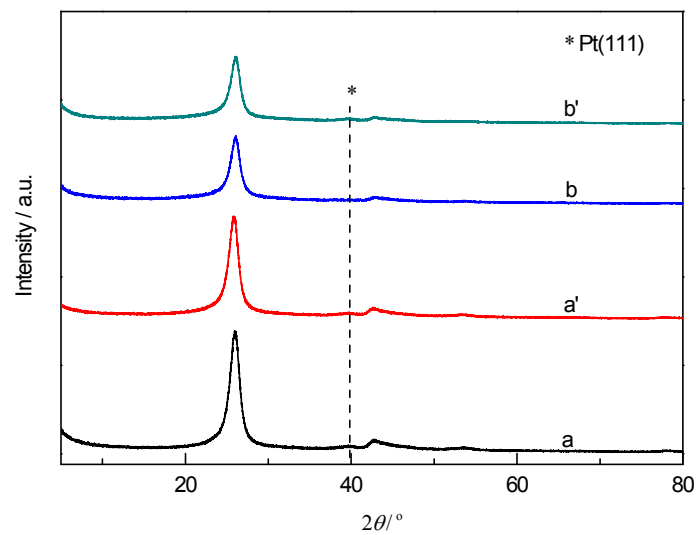

**Fig. S4** XRD patterns of the fresh and recycled catalysts: (a) 1%Pt/CNTs-353, (a') 1%Pt/CNTs-353 after 5 runs of reaction, (b) 1%Pt/N-CNTs(5.74), (b') 1%Pt/N-CNTs(5.74) after 5 runs of reaction.

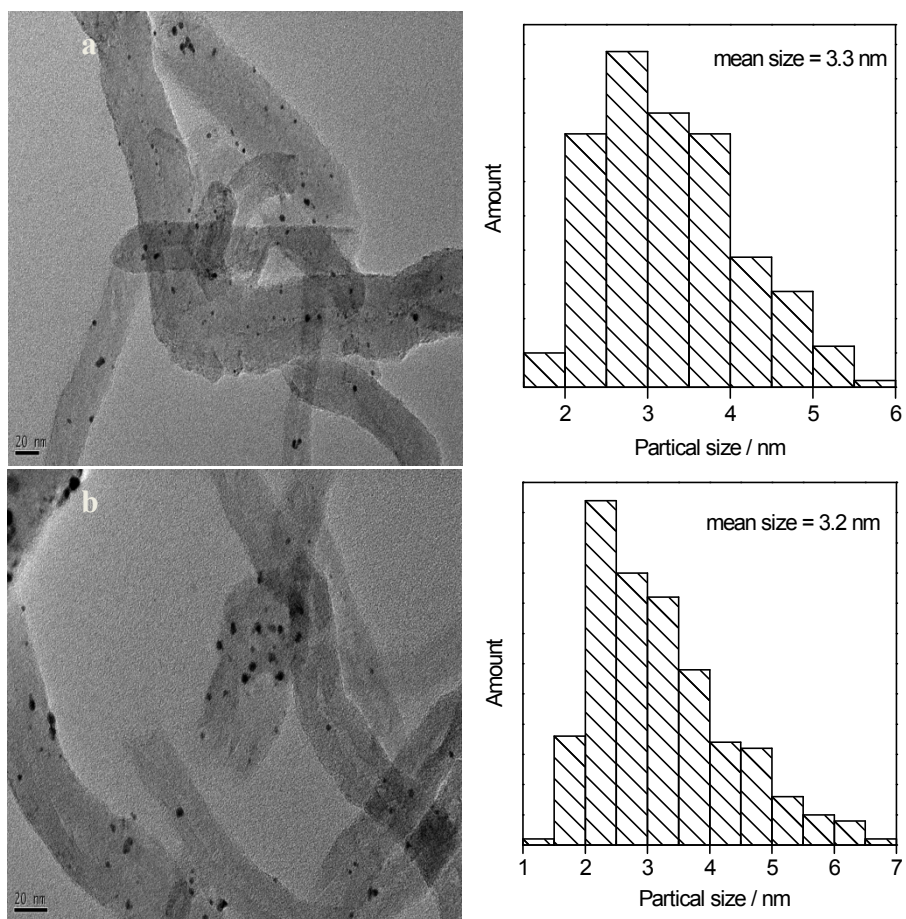

**Fig. S5** TEM images of (a) 1%Pt/CNTs-353 and (b) 1%Pt/N-CNTs(5.74) catalysts after 5 runs of reactions.

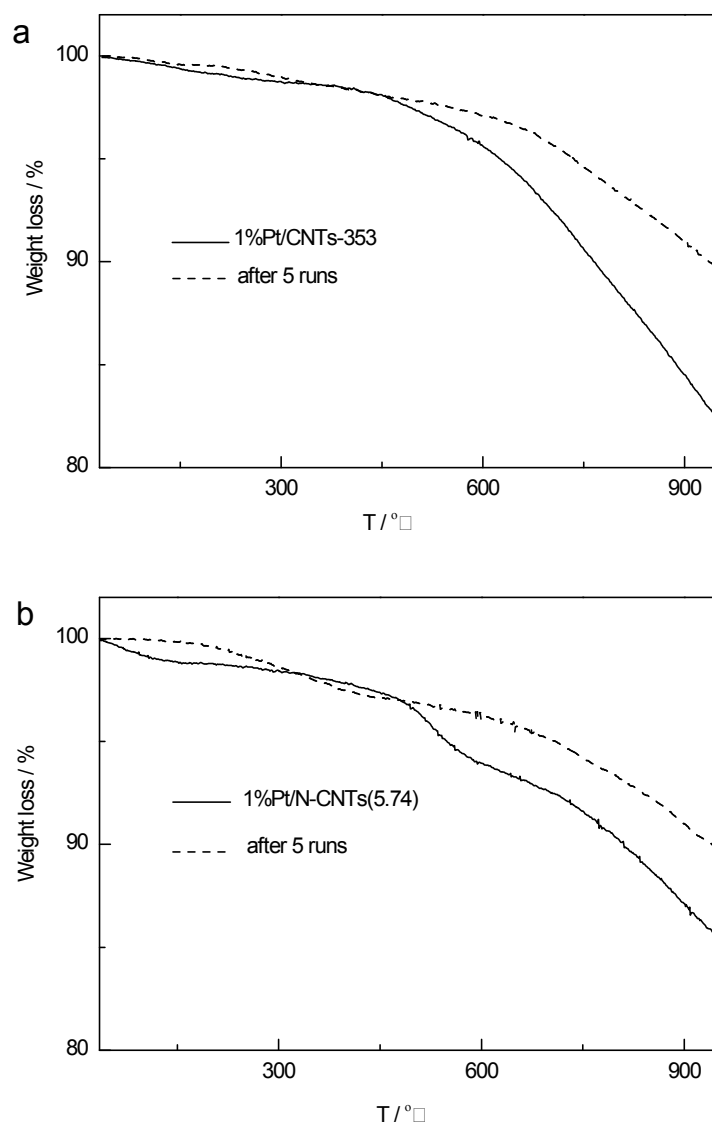

**Fig. S6** TGA curves of catalysts before and after 5 runs reactions: (a) 1%Pt/CNTs-353, (b) 1%Pt/N-CNTs(5.74).
